# Supplementary material for: An exploratory randomised double-blind and placebo-controlled phase 2 study of a combination of baclofen, naltrexone and sorbitol (PXT3003) in patients with Charcot-Marie-Tooth disease type 1A
Source: PubMed Central journal article supplement (PMC4311411; doi:10.1186/s13023-014-0199-0), 2014-12-18
Supplement: 13023_2014_199_MOESM4_ESM.pdf [file 13023_2014_199_MOESM4_ESM.pdf]

**Additional Table 4 | Response to PXT3003 on efficacy outcomes (Full Analysis Set, *n* = 80).** Data are mean (s.d.) baseline and final values, and % (s.d.) of improvement for each treatment group and PLI. Differences between treatment groups were assessed by Analysis of Covariance (Ancova) on log-transformed values by adjusting for baseline values. Estimates were provided as mean percentage change over baseline (90% CI). Dose-effect was tested through Spearman’s rank correlation. *P*-values are one-tailed. CMTNS = Charcot-Marie-Tooth Neuropathy Score; ONLS = Overall Neuropathy Limitations Scale; 6MWT = 6-Minute Walk Test; 9HPT = 9-Hole Peg Test; CMAP = Amplitudes of Compound Muscle Action Potentials; MCV = Motor Conduction Velocity; DML = Distal Motor Latency; SNAP = Amplitudes of Sensory Nerve Action Potentials; SCV = Sensitive Conduction Velocity; VAS = Visual Analog Scale; CGI = Clinical Global Impression.

|                              | Placebo<br>( <i>n</i> = 19) |               |               | PXT3003 LD<br>( <i>n</i> = 21) |              |               | PXT3003 ID<br>( <i>n</i> = 21) |              |               | PXT3003 HD<br>( <i>n</i> = 19) |              |               |
|------------------------------|-----------------------------|---------------|---------------|--------------------------------|--------------|---------------|--------------------------------|--------------|---------------|--------------------------------|--------------|---------------|
|                              | Baseline                    | Final         | % Improvement | Baseline                       | Final        | % Improvement | Baseline                       | Final        | % Improvement | Baseline                       | Final        | % Improvement |
| CMTNS                        | 14.3 (3.8)                  | 14.2 (3.8)    | 2.6 (17.5)    | 14.2 (4.1)                     | 14.5 (4.2)   | 0.5 (23.2)    | 13.0 (4.0)                     | 13.5 (3.7)   | -3.1 (16.0)   | 13.8 (3.4)                     | 13.2 (3.9)   | 7.7 (18.4)    |
| CMTES                        | 9.5 (3.0)                   | 9.4 (2.7)     | 3.8 (25.1)    | 9.5 (3.4)                      | 9.9 (3.3)    | -2.1 (25.0)   | 8.8 (2.9)                      | 9.1 (3.1)    | -2.0 (20.0)   | 8.8 (2.7)                      | 8.5 (2.7)    | 6.8 (21.8)    |
| CMTNS: Sensory Symptoms      | 1.8 (1.1)                   | 1.6 (0.8)     | 26.3 (87.2)   | 2.1 (1.1)                      | 2.1 (1.2)    | 19.4 (84.2)   | 1.5 (0.7)                      | 1.6 (0.7)    | -0.8 (29.1)   | 1.7 (0.8)                      | 1.4 (0.6)    | 36.0 (79.0)   |
| CMTNS: Motor Symptoms: Legs  | 2.4 (0.8)                   | 2.3 (0.7)     | 5.3 (15.8)    | 2.3 (0.6)                      | 2.3 (0.7)    | 4.0 (26.8)    | 2.2 (0.8)                      | 2.1 (0.9)    | 17.5 (41.7)   | 2.1 (0.5)                      | 2.1 (0.5)    | 0.0 (0.0)     |
| CMTNS: Motor Symptoms: Arms  | 1.7 (0.8)                   | 1.6 (0.6)     | 5.3 (22.9)    | 1.9 (0.6)                      | 1.8 (0.5)    | 4.8 (26.9)    | 1.8 (0.5)                      | 1.7 (0.6)    | 11.9 (38.4)   | 1.7 (0.6)                      | 1.6 (0.6)    | 5.3 (22.9)    |
| CMTNS: Pin Sensitivity       | 2.5 (1.0)                   | 2.4 (0.8)     | 10.5 (55.3)   | 2.3 (1.0)                      | 2.1 (0.9)    | 27.8 (78.2)   | 2.4 (1.1)                      | 2.6 (0.9)    | -3.6 (35.4)   | 2.2 (0.9)                      | 2.1 (0.9)    | 21.9 (74.3)   |
| CMTNS: Vibration Sensitivity | 2.8 (0.9)                   | 3.3 (1.3)     | -4.7 (35.2)   | 2.8 (1.0)                      | 3.3 (1.2)    | -11.2 (28.7)  | 2.7 (1.2)                      | 3.2 (1.1)    | -11.1 (38.4)  | 2.7 (0.7)                      | 3.0 (1.0)    | -3.2 (27.0)   |
| CMTNS: Strength: Legs        | 2.7 (0.7)                   | 2.6 (0.7)     | 5.3 (19.3)    | 2.6 (0.8)                      | 2.6 (0.7)    | 0.0 (21.9)    | 2.6 (0.7)                      | 2.6 (0.7)    | 0.8 (13.4)    | 2.8 (1.0)                      | 2.6 (0.9)    | 9.2 (19.0)    |
| CMTNS: Strength: Arms        | 2.5 (0.6)                   | 2.6 (0.6)     | 0.0 (21.5)    | 2.6 (0.9)                      | 2.7 (0.7)    | -0.4 (30.1)   | 2.4 (0.9)                      | 2.3 (0.8)    | 4.4 (18.9)    | 2.6 (1.1)                      | 2.7 (0.8)    | -3.9 (20.5)   |
| CMTNS: CMAP                  | 2.7 (0.9)                   | 2.6 (1.0)     | 7.9 (27.4)    | 2.7 (0.9)                      | 2.6 (0.8)    | 6.3 (37.7)    | 2.4 (1.0)                      | 2.2 (0.9)    | 11.9 (30.8)   | 2.8 (1.0)                      | 2.6 (0.9)    | 8.8 (24.4)    |
| CMTNS: SNAP                  | 4.1 (1.3)                   | 4.2 (1.2)     | -2.1 (20.8)   | 4.0 (1.2)                      | 4.0 (1.4)    | 13.8 (53.6)   | 3.9 (1.4)                      | 4.1 (1.3)    | -1.0 (42.1)   | 4.2 (1.1)                      | 4.1 (1.0)    | 4.1 (28.5)    |
| ONLS                         | 3.1 (1.1)                   | 3.3 (0.9)     | -5.3 (19.3)   | 3.3 (1.0)                      | 3.6 (0.9)    | -6.5 (18.5)   | 3.5 (0.9)                      | 3.4 (0.9)    | 4.8 (24.2)    | 3.6 (0.8)                      | 3.4 (1.0)    | 12.3 (28.4)   |
| ONLS: Arm                    | 2.4 (0.8)                   | 2.4 (0.8)     | 3.5 (18.1)    | 2.7 (0.7)                      | 2.9 (0.7)    | -4.4 (11.1)   | 2.7 (0.7)                      | 2.7 (0.7)    | 7.1 (45.5)    | 2.7 (0.7)                      | 2.5 (0.8)    | 20.2 (37.9)   |
| ONLS: Leg                    | 2.7 (0.5)                   | 2.9 (0.3)     | -7.0 (14.0)   | 2.6 (0.5)                      | 2.8 (0.4)    | -4.0 (18.2)   | 2.8 (0.4)                      | 2.7 (0.5)    | 2.4 (10.9)    | 2.8 (0.4)                      | 2.9 (0.3)    | -1.8 (7.6)    |
| 6MWT (m)                     | 468.2 (99.9)                | 509.2 (107.7) | 9.0 (8.3)     | 473.1 (70.9)                   | 500.9 (75.7) | 6.2 (8.3)     | 450.7 (71.1)                   | 481.4 (95.2) | 6.4 (9.4)     | 429.3 (83.7)                   | 472.0 (98.0) | 9.9 (6.9)     |
| 9HPT (s)                     | 17.2 (2.5)                  | 16.6 (3.0)    | 4.9 (11.4)    | 16.1 (3.9)                     | 16.3 (3.5)   | -1.2 (11.7)   | 18.4 (4.7)                     | 17.4 (3.8)   | 5.6 (9.9)     | 20.8 (7.8)                     | 19.1 (5.9)   | 7.8 (12.1)    |
| Ankle Dorsiflexion (Nm)      | 7.8 (6.6)                   | 7.4 (5.6)     | 20.2 (88.4)   | 9.1 (5.0)                      | 7.7 (3.6)    | -3.6 (43.0)   | 8.3 (5.6)                      | 8.3 (5.1)    | 81.5 (369.6)  | 8.2 (6.1)                      | 7.9 (5.2)    | 20.4 (64.1)   |
| Grip (kg)                    | 22.6 (10.7)                 | 24.5 (12.0)   | 9.9 (24.2)    | 21.6 (6.1)                     | 22.1 (7.8)   | 1.3 (15.6)    | 23.1 (9.2)                     | 24.0 (9.3)   | 4.7 (12.5)    | 20.6 (10.4)                    | 22.4 (10.3)  | 11.7 (18.1)   |
| CMAP (milliV)                | 3.7 (2.0)                   | 4.4 (2.0)     | 34.4 (62.0)   | 4.0 (1.8)                      | 3.5 (1.7)    | 1.4 (38.7)    | 3.7 (2.1)                      | 4.0 (2.2)    | 22.9 (62.6)   | 3.4 (2.3)                      | 3.9 (2.1)    | 64.2 (208.5)  |
| MCV (m/s)                    | 21.5 (3.6)                  | 22.4 (4.7)    | 3.7 (8.5)     | 22.7 (4.7)                     | 22.5 (5.6)   | 3.0 (11.5)    | 20.8 (4.8)                     | 21.6 (3.8)   | 5.7 (12.3)    | 20.5 (5.3)                     | 21.6 (4.8)   | 9.0 (17.6)    |
| DML (ms)                     | 8.6 (2.2)                   | 8.6 (2.3)     | 0.4 (8.8)     | 7.9 (2.1)                      | 7.9 (2.0)    | 3.6 (21.7)    | 8.2 (1.8)                      | 7.3 (1.3)    | 15.3 (35.8)   | 8.2 (1.9)                      | 7.6 (1.4)    | 8.4 (21.7)    |
| SNAP (microV)                | 2.6 (3.2)                   | 2.6 (2.9)     | 12.4 (121.7)  | 2.3 (3.0)                      | 3.0 (3.7)    | 11.5 (88.2)   | 2.6 (3.8)                      | 2.8 (3.6)    | 23.3 (128.4)  | 2.2 (2.7)                      | 2.5 (2.7)    | 5.2 (69.0)    |
| SCV (m/s)                    | 31.1 (14.8)                 | 31.3 (12.1)   | 3.4 (11.0)    | 29.4 (8.2)                     | 30.9 (7.5)   | 5.3 (11.2)    | 31.3 (9.4)                     | 33.9 (9.1)   | 29.5 (63.4)   | 29.9 (7.7)                     | 35.8 (10.4)  | 30.5 (10.0)   |
| VAS: Pain                    | 83.9 (23.1)                 | 80.8 (21.2)   | 0.8 (32.0)    | 85.6 (16.8)                    | 70.9 (23.7)  | -16.7 (23.4)  | 82.0 (17.5)                    | 84.3 (16.7)  | 9.1 (41.3)    | 80.9 (22.2)                    | 71.1 (24.0)  | -6.7 (44.3)   |
| VAS: Fatigue                 | 61.6 (27.4)                 | 65.8 (26.3)   | 29.8 (80.3)   | 70.0 (20.8)                    | 57.1 (26.1)  | -17.4 (33.7)  | 70.2 (18.6)                    | 61.2 (22.3)  | -6.8 (40.5)   | 62.6 (29.6)                    | 57.3 (26.4)  | -1.0 (39.7)   |
| VAS: Global                  | 65.5 (25.3)                 | 74.7 (18.6)   | 51.3 (152.4)  | 72.5 (18.9)                    | 71.4 (18.5)  | 1.8 (27.8)    | 64.4 (27.5)                    | 71.4 (21.2)  | 62.3 (161.6)  | 78.4 (16.5)                    | 70.8 (19.8)  | -8.1 (26.3)   |
| CGI: Global Improvement      | 4.0 (0.0)                   | 4.1 (0.2)     | -1.1 (4.6)    | 4.0 (0.0)                      | 4.0 (0.3)    | 0.6 (8.7)     | 4.0 (0.0)                      | 3.7 (0.5)    | 9.5 (15.4)    | 4.0 (0.0)                      | 4.1 (0.3)    | -2.1 (6.3)    |
| CGI: Illness Severity        | 3.5 (1.1)                   | 3.4 (1.1)     | 5.9 (27.6)    | 3.5 (0.8)                      | 3.5 (0.9)    | 12.7 (68.0)   | 3.5 (0.7)                      | 3.7 (1.1)    | -1.7 (23.9)   | 3.7 (0.9)                      | 3.8 (0.9)    | -2.6 (16.4)   |
| CGI: Therapeutic Effect      | 4.0 (0.0)                   | 3.9 (0.2)     | 1.8 (7.6)     | 4.0 (0.0)                      | 4.0 (0.2)    | 1.6 (7.3)     | 4.0 (0.0)                      | 3.7 (0.6)    | 12.7 (24.7)   | 4.0 (0.0)                      | 4.0 (0.0)    | 0.0 (0.0)     |

|                                     | PLI<br>(n = 61) |              | PXT3003 LD<br>versus Placebo |                    | PXT3003 ID<br>versus Placebo |                    | PXT3003 HD<br>versus Placebo |                    | PXT3003 HD<br>versus PLI |                   | Dose-effect |             |         |
|-------------------------------------|-----------------|--------------|------------------------------|--------------------|------------------------------|--------------------|------------------------------|--------------------|--------------------------|-------------------|-------------|-------------|---------|
|                                     | Baseline        | Final        | %<br>Improvement             | Estimate           | P-value                      | Estimate           | P-value                      | Estimate           | P-value                  | Estimate          | P-value     | Correlation | P-value |
| <b>CMTNS</b>                        | 13.9 (4.0)      | 14.0 (3.9)   | -0.1 (19.0)                  | -2.6 (-11.9;7.6)   | 0.67                         | -3.1 (-11.0;5.4)   | 0.74                         | 5.5 (-3.4;15.2)    | 0.16                     | 8.0 (0.4;16.2)    | 0.042       | 0.06        | 0.3     |
| <b>CMTES</b>                        | 9.3 (3.1)       | 9.5 (3.0)    | -0.2 (23.2)                  | -4.9 (-15.4;6.9)   | 0.76                         | -1.9 (-12.1;9.4)   | 0.62                         | 6.3 (-5.3;19.2)    | 0.19                     | 8.7 (-0.39;18.6)  | 0.058       | 0.034       | 0.38    |
| <b>CMTNS: Sensory Symptoms</b>      | 1.8 (1.0)       | 1.8 (1.0)    | 14.6 (71.1)                  | -13.0 (-31.8;10.9) | 0.83                         | -6.6 (-23.7;14.2)  | 0.72                         | 14.0 (-8.1;41.3)   | 0.16                     | 21.0 (1.4;44.3)   | 0.038       | 0.081       | 0.24    |
| <b>CMTNS: Motor Symptoms: Legs</b>  | 2.3 (0.7)       | 2.2 (0.8)    | 9.0 (30.5)                   | -2.6 (-11.6;7.3)   | 0.68                         | 7.4 (-5.5;22.1)    | 0.18                         | -3.3 (-8.0;1.7)    | 0.87                     | -5.3 (-13.4;3.6)  | 0.84        | -0.038      | 0.63    |
| <b>CMTNS: Motor Symptoms: Arms</b>  | 1.8 (0.6)       | 1.7 (0.6)    | 7.4 (30.1)                   | -5.1 (-15.1;6.2)   | 0.78                         | -0.1 (-12.6;14.2)  | 0.51                         | -0.007 (-9.5;10.5) | 0.5                      | 1.1 (-8.2;11.4)   | 0.42        | -0.02       | 0.57    |
| <b>CMTNS: Pin Sensitivity</b>       | 2.4 (1.0)       | 2.4 (0.9)    | 11.6 (59.6)                  | 18.1 (-3.9;45.2)   | 0.091                        | -6.4 (-20.6;10.4)  | 0.75                         | 15.3 (-6.3;42.0)   | 0.13                     | 9.4 (-7.5;29.4)   | 0.19        | -0.056      | 0.69    |
| <b>CMTNS: Vibration Sensitivity</b> | 2.8 (1.0)       | 3.3 (1.2)    | -9.2 (33.9)                  | -5.1 (-20.6;13.5)  | 0.69                         | -3.8 (-19.4;14.8)  | 0.64                         | 4.8 (-12.2;25.1)   | 0.33                     | 8.6 (-5.3;24.4)   | 0.16        | 0.017       | 0.44    |
| <b>CMTNS: Strength: Legs</b>        | 2.6 (0.8)       | 2.6 (0.7)    | 1.9 (18.3)                   | -3.7 (-12.8;6.2)   | 0.74                         | -2.8 (-10.1;5.2)   | 0.73                         | 3.6 (-5.0;13.0)    | 0.25                     | 6.1 (-1.2;13.9)   | 0.084       | 0.085       | 0.23    |
| <b>CMTNS: Strength: Arms</b>        | 2.5 (0.8)       | 2.5 (0.7)    | 1.4 (23.8)                   | -2.4 (-14.2;11.0)  | 0.63                         | 7.1 (-3.0;18.2)    | 0.12                         | -3.6 (-12.5;6.2)   | 0.73                     | -5.5 (-14.0;3.8)  | 0.84        | 0.012       | 0.46    |
| <b>CMTNS: CMAP</b>                  | 2.6 (0.9)       | 2.5 (0.9)    | 8.7 (32.0)                   | -3.5 (-16.4;11.4)  | 0.66                         | 4.8 (-7.9;19.1)    | 0.27                         | 0.2 (-11.1;13.0)   | 0.49                     | -0.8 (-11.0;10.7) | 0.55        | 0.089       | 0.22    |
| <b>CMTNS: SNAP</b>                  | 4.0 (1.3)       | 4.1 (1.3)    | 3.7 (41.6)                   | 9.9 (-7.1;30.0)    | 0.17                         | -1.4 (-16.7;16.7)  | 0.56                         | 3.2 (-8.3;16.1)    | 0.33                     | 0.7 (-12.5;15.9)  | 0.47        | 0.024       | 0.42    |
| <b>ONLS</b>                         | 3.3 (1.0)       | 3.4 (0.9)    | -2.2 (21.2)                  | -3.9 (-14.2;7.6)   | 0.72                         | 6.9 (-3.8;18.8)    | 0.15                         | 14.4 (0.55;30.2)   | 0.043                    | 12.1 (2.0;23.2)   | 0.024       | 0.28        | 0.0059  |
| <b>ONLS: Arm</b>                    | 2.6 (0.8)       | 2.6 (0.8)    | 2.0 (29.2)                   | -8.1 (-15.2;-0.41) | 0.96                         | -2.8 (-14.2;10.2)  | 0.65                         | 13.7 (0.22;29.0)   | 0.047                    | 15.7 (4.9;27.6)   | 0.0076      | 0.22        | 0.027   |
| <b>ONLS: Leg</b>                    | 2.7 (0.5)       | 2.8 (0.4)    | -2.7 (15.0)                  | 4.5 (-3.0;12.5)    | 0.16                         | 9.7 (3.1;16.7)     | 0.0078                       | 3.0 (-2.7;9.0)     | 0.19                     | -0.9 (-6.2;4.7)   | 0.61        | 0.21        | 0.03    |
| <b>6MWT (m)</b>                     | 463.8 (80.0)    | 496.6 (92.1) | 7.1 (8.6)                    | -2.4 (-6.2;1.5)    | 0.85                         | -2.4 (-6.6;2.0)    | 0.82                         | 0.7 (-3.2;4.7)     | 0.38                     | 2.6 (-0.73;6.1)   | 0.099       | 0.11        | 0.16    |
| <b>9HPT (s)</b>                     | 17.2 (3.9)      | 16.8 (3.4)   | 3.1 (11.3)                   | -4.6 (-10.3;1.5)   | 0.89                         | -0.2 (-5.3;5.2)    | 0.52                         | 0.3 (-5.7;6.6)     | 0.47                     | 1.2 (-3.4;6.0)    | 0.33        | 0.15        | 0.092   |
| <b>Ankle Dorsiflexion (Nm)</b>      | 8.4 (5.7)       | 7.8 (4.7)    | 33.1 (223.2)                 | -4.0 (-21.7;17.8)  | 0.63                         | 11.4 (-15.4;46.8)  | 0.26                         | 8.2 (-13.8;35.9)   | 0.28                     | 5.5 (-12.8;27.7)  | 0.32        | 0.11        | 0.16    |
| <b>Grip (kg)</b>                    | 22.4 (8.7)      | 23.5 (9.7)   | 5.1 (17.9)                   | -7.1 (-15.6;2.1)   | 0.9                          | -3.6 (-11.8;5.4)   | 0.75                         | 1.6 (-7.7;11.9)    | 0.39                     | 6.0 (-1.2;13.7)   | 0.088       | 0.12        | 0.15    |
| <b>CMAP (milliV)</b>                | 3.8 (2.0)       | 4.0 (2.0)    | 19.6 (56.5)                  | -25.1 (-44.8;1.5)  | 0.94                         | -9.2 (-27.3;13.5)  | 0.77                         | -5.1 (-27.1;23.6)  | 0.63                     | 6.6 (-15.8;35.1)  | 0.33        | -0.0011     | 0.5     |
| <b>MCV (m/s)</b>                    | 21.6 (4.4)      | 22.2 (4.7)   | 4.2 (10.9)                   | -1.0 (-6.5;4.9)    | 0.61                         | 0.5 (-4.8;6.2)     | 0.44                         | 2.8 (-3.4;9.4)     | 0.23                     | 2.5 (-2.4;7.7)    | 0.21        | 0.11        | 0.18    |
| <b>DML (ms)</b>                     | 8.2 (2.0)       | 7.9 (2.0)    | 6.7 (25.6)                   | 3.4 (-4.3;11.7)    | 0.24                         | 13.8 (4.2;24.3)    | 0.0092                       | 8.0 (0.59;16.0)    | 0.038                    | 2.2 (-5.1;10.0)   | 0.31        | 0.21        | 0.035   |
| <b>SNAP (microV)</b>                | 2.5 (3.3)       | 2.8 (3.4)    | 15.9 (110.2)                 | -1.2 (-42.9;71.0)  | 0.52                         | 8.7 (-31.2;71.6)   | 0.38                         | 13.9 (-24.1;71.0)  | 0.29                     | 12.0 (-23.9;64.9) | 0.31        | 0.089       | 0.3     |
| <b>SCV (m/s)</b>                    | 30.6 (10.7)     | 32.0 (9.2)   | 12.7 (38.0)                  | 1.5 (-5.8;9.4)     | 0.36                         | 17.5 (-5.5;46.2)   | 0.11                         | 26.6 (15.5;38.8)   | 0.00037                  | 20.1 (2.4;40.8)   | 0.03        | 0.42        | 0.0098  |
| <b>VAS: Pain</b>                    | 83.9 (18.9)     | 78.6 (21.2)  | -2.4 (34.4)                  | -17.4 (-30.7;-1.6) | 0.96                         | 6.7 (-7.2;22.6)    | 0.22                         | -13.6 (-29.0;5.3)  | 0.89                     | -10.3 (-23.2;4.8) | 0.88        | -0.057      | 0.69    |
| <b>VAS: Fatigue</b>                 | 67.5 (22.4)     | 61.2 (24.7)  | 1.0 (57.1)                   | -25.6 (-43.1;-2.7) | 0.96                         | -10.5 (-28.8;12.6) | 0.79                         | -17.0 (-34.4;5.0)  | 0.91                     | -2.5 (-20.3;19.3) | 0.58        | -0.094      | 0.8     |
| <b>VAS: Global</b>                  | 67.5 (24.0)     | 72.4 (19.2)  | 38.0 (129.0)                 | -8.1 (-21.0;6.9)   | 0.82                         | -11.4 (-33.5;18.0) | 0.76                         | -10.5 (-24.5;6.1)  | 0.86                     | -2.6 (-19.4;17.7) | 0.59        | -0.21       | 0.97    |
| <b>CGI: Global Improvement</b>      | 4.0 (0.0)       | 3.9 (0.4)    | 3.2 (11.5)                   | 1.5 (-2.2;5.3)     | 0.25                         | 9.8 (4.0;16.0)     | 0.0032                       | -1.2 (-4.4;2.2)    | 0.72                     | -4.8 (-8.7;-0.69) | 0.97        | 0.051       | 0.33    |
| <b>CGI: Illness Severity</b>        | 3.5 (0.8)       | 3.5 (1.0)    | 5.6 (44.7)                   | -1.4 (-15.6;15.2)  | 0.56                         | -8.1 (-18.9;4.1)   | 0.87                         | -8.3 (-17.5;1.9)   | 0.91                     | -6.1 (-16.0;5.0)  | 0.82        | -0.15       | 0.91    |
| <b>CGI: Therapeutic Effect</b>      | 4.0 (0.0)       | 3.9 (0.4)    | 5.5 (16.3)                   | -0.1 (-3.5;3.3)    | 0.53                         | 9.0 (1.1;17.5)     | 0.03                         | -1.5 (-4.0;1.0)    | 0.84                     | -4.3 (-8.8;0.36)  | 0.94        | 0.042       | 0.35    |
