# Supplementary material for: An exploratory randomised double-blind and placebo-controlled phase 2 study of a combination of baclofen, naltrexone and sorbitol (PXT3003) in patients with Charcot-Marie-Tooth disease type 1A
Source: Springer Nature journal article supplement (doi:10.1186/s13023-014-0199-0), 2014-12-01
Supplement: MOESM1 [file 9775976]

**Additional Table 1 | PXT3003 daily doses (mg per day) per group.**

| <b>PXT3003</b>                         | <b>Baclofen</b>           | <b>Naltrexone</b>                 | <b>Sorbitol</b>             | <b>Dilution</b> |
|----------------------------------------|---------------------------|-----------------------------------|-----------------------------|-----------------|
| Low dose (LD)                          | 0.6                       | 0.07                              | 21                          | 1/10            |
| Intermediate dose (ID)                 | 1.2                       | 0.14                              | 42                          | 1/5             |
| High dose (HD)                         | 6                         | 0.7                               | 210                         | 1               |
| <b>Authorized<br/>recommended dose</b> | 60<br><i>(spasticity)</i> | 50<br><i>(alcohol dependence)</i> | 15 000<br><i>(aperient)</i> |                 |
