# Supplementary material for: An exploratory randomised double-blind and placebo-controlled phase 2 study of a combination of baclofen, naltrexone and sorbitol (PXT3003) in patients with Charcot-Marie-Tooth disease type 1A
Source: Springer Nature journal article supplement (doi:10.1186/s13023-014-0199-0), 2014-12-01
Supplement: MOESM2 [file 9775976]

**Additional Table 2 | Baclofen concentrations in plasma, expressed in ng/mL (s.d.).**

| <b>Time</b>      | <b>PXT3003 LD</b> |             | <b>PXT3003 ID</b> |             | <b>PXT3003 HD</b> |             |
|------------------|-------------------|-------------|-------------------|-------------|-------------------|-------------|
|                  | <b>Trough</b>     | <b>Peak</b> | <b>Trough</b>     | <b>Peak</b> | <b>Trough</b>     | <b>Peak</b> |
| <b>1 month</b>   | 0.7 (0.5)         | 4.7 (1.3)   | 1.8 (2.2)         | 9.9 (3.1)   | 7.7 (4.6)         | 49.9 (13.5) |
| <b>6 months</b>  | 1.3 (1.8)         | 4.1 (1.8)   | 4.1 (10.7)        | 13.8 (12)   | 9.4 (9.6)         | 47.0 (21.1) |
| <b>12 months</b> | 0.7 (0.4)         | 5.3 (2.2)   | 2.0 (2.5)         | 10.7 (5.2)  | 8.2 (6.0)         | 51.8 (19.8) |
