# Supplementary material for: An exploratory randomised double-blind and placebo-controlled phase 2 study of a combination of baclofen, naltrexone and sorbitol (PXT3003) in patients with Charcot-Marie-Tooth disease type 1A
Source: Springer Nature journal article supplement (doi:10.1186/s13023-014-0199-0), 2014-12-01
Supplement: MOESM3 [file 9775976]

**Additional Table 3 | Minimum Effective Dose search performed by closed Step-Down procedure for comparing ordered doses with a control (S2DH algorithm). \* $P < 0.05$ .**

| <b>Contrasts</b> |                   |                   |                   |                                    |
|------------------|-------------------|-------------------|-------------------|------------------------------------|
| <b>Placebo</b>   | <b>PXT3003 LD</b> | <b>PXT3003 ID</b> | <b>PXT3003 HD</b> | <b>P-value O'Brien(CMTNS,ONLS)</b> |
| -1               | 1                 | 0                 | 0                 | 0.969                              |
| -1               | -1                | 2                 | 0                 | 0.513                              |
| -1               | -1                | -1                | 3                 | 0.006*                             |
