# Supplementary material for: An exploratory randomised double-blind and placebo-controlled phase 2 study of a combination of baclofen, naltrexone and sorbitol (PXT3003) in patients with Charcot-Marie-Tooth disease type 1A
Source: Springer Nature journal article supplement (doi:10.1186/s13023-014-0199-0), 2014-12-01
Supplement: MOESM5 [file 9775976]

**Additional Table 5 | Characteristics of non-deteriorated and deteriorated patients at baseline (Full Analysis Set,  $n = 80$ ).** Data are mean (s.d.) values at baseline.  $P$ -values of between-group differences at baseline were assessed by Anova.  $*P < 0.05$ ; Shading = best mean value at baseline within non-deteriorated and deteriorated patients. CMTNS = Charcot-Marie-Tooth Neuropathy Score; ONLS = Overall Neuropathy Limitations Scale; 6MWT = 6-Minute Walk Test; 9HPT = 9-Hole Peg Test; CMAP = Amplitudes of Compound Muscle Action Potentials; MCV = Motor Conduction Velocity; DML = Distal Motor Latency; SNAP = Amplitudes of Sensory Nerve Action Potentials; SCV = Sensitive Conduction Velocity.

|                                | a - Baseline in PXT3003 HD       |                             |            | b - Baseline in Placebo          |                             |            |
|--------------------------------|----------------------------------|-----------------------------|------------|----------------------------------|-----------------------------|------------|
|                                | Non-deteriorated<br>( $n = 15$ ) | Deteriorated<br>( $n = 4$ ) | $P$ -value | Non-deteriorated<br>( $n = 10$ ) | Deteriorated<br>( $n = 9$ ) | $P$ -value |
| <b>CMTNS</b>                   | 13.3 (3.2)                       | 16.0 (3.6)                  | 0.16       | 15.0 (3.1)                       | 13.6 (4.6)                  | 0.42       |
| <b>ONLS</b>                    | 3.5 (0.8)                        | 3.8 (0.5)                   | 0.63       | 3.3 (0.8)                        | 2.9 (1.4)                   | 0.43       |
| <b>6MWT (m)</b>                | 448.3 (67.8)                     | 358.0 (109.5)               | 0.052      | 446.3 (97.3)                     | 490.2 (103.3)               | 0.37       |
| <b>9HPT (s)</b>                | 20.5 (7.9)                       | 21.9 (8.3)                  | 0.76       | 16.8 (2.3)                       | 17.6 (2.7)                  | 0.46       |
| <b>Ankle Dorsiflexion (Nm)</b> | 8.0 (5.5)                        | 8.9 (8.8)                   | 0.79       | 7.7 (8.0)                        | 7.9 (5.0)                   | 0.94       |
| <b>Grip (kg)</b>               | 22.5 (10.4)                      | 13.5 (7.8)                  | 0.13       | 23.1 (11.2)                      | 21.9 (10.7)                 | 0.81       |
| <b>CMAP (milliV)</b>           | 3.8 (2.0)                        | 1.8 (3.1)                   | 0.14       | 4.0 (1.9)                        | 3.3 (2.2)                   | 0.47       |
| <b>MCV (m/s)</b>               | 22.5 (3.5)                       | 14.7 (5.7)                  | 0.0051*    | 21.1 (4.1)                       | 22.1 (3.0)                  | 0.58       |
| <b>DML (ms)</b>                | 7.6 (1.4)                        | 10.2 (2.4)                  | 0.010*     | 8.4 (1.3)                        | 8.9 (3.0)                   | 0.64       |
| <b>SNAP (microV)</b>           | 2.4 (2.8)                        | 1.4 (2.8)                   | 0.54       | 2.7 (3.4)                        | 2.5 (3.1)                   | 0.91       |
| <b>SCV (m/s)</b>               | 30.3 (8.6)                       | 28.2 (NA)                   | 0.83       | 24.4 (5.1)                       | 35.1 (17.8)                 | 0.36       |
